# Supplementary material for: Number of Primordial Follicles in Juvenile Ringed Seals (Pusa hispida) from the Gulf of Bothnia and West Greenland
Source: MDPI journal article supplement (doi:10.3390/ani12050669), 2022-03-07
Supplement: s1 [file s1]

## Supplementary Material

**Table S1.** All points hitting primordial follicles P(follicle) and all points hitting the ovary P P(ovary) were counted for the ovaries of ringed seals from three different countries. As a result of Formula 1, the volume density  $V_v(\text{follicle/ovary})$  was calculated with P(follicle) and P(ovary).  $V_v(\text{follicle/ovary})$  and V(ovary), the volume of the ovary, were used to calculate the total volume of follicles in the ovary V(follicle, ovary) based on Formula 2. Using this value and number-weighted mean volume of follicles  $V_N(\text{follicle})$ , the total number of follicles in the ovary was determined.

| Individual<br>s | Age | Country | P<br>(follicle) | P<br>(ovary) | $V_v$<br>(follicle/ovary)<br>[%] | V (ovary)<br>[cm <sup>3</sup> ] | V(follicle, ovary)<br>[cm <sup>3</sup> ] | $V_N$ (follicle)<br>[cm <sup>3</sup> ] | N(follicle, ovary) |
|-----------------|-----|---------|-----------------|--------------|----------------------------------|---------------------------------|------------------------------------------|----------------------------------------|--------------------|
| P.h. 1          |     | Sweden  | 37              | 6544         | 5.654                            | 0.99                            | $56.0 \cdot 10^{-4}$                     | $7.58 \cdot 10^{-9}$                   | 738,456            |
| P.h. 2          |     | Sweden  | 20              | 10576        | 1.891                            | 1.62                            | $30.6 \cdot 10^{-4}$                     | NA                                     | NA                 |
| P.h. 3          |     | Sweden  | 12              | 5376         | 2.232                            | 0.65                            | $14.5 \cdot 10^{-4}$                     | $5.41 \cdot 10^{-9}$                   | 268,188            |
| P.h. 4          |     | Sweden  | 9               | 9360         | 0.962                            | 1.09                            | $10.5 \cdot 10^{-4}$                     | NA                                     | NA                 |
| P.h. 5          |     | Sweden  | 53              | 11776        | 4.501                            | 1.04                            | $46.8 \cdot 10^{-4}$                     | $1.36 \cdot 10^{-9}$                   | 3,441,696          |
| P.h. 6          |     | Sweden  | 60              | 11728        | 5.116                            | 1.08                            | $55.3 \cdot 10^{-4}$                     | $9.90 \cdot 10^{-9}$                   | 558,105            |
| P.h. 7          |     | Sweden  | 20              | 8144         | 2.456                            | 1.04                            | $25.5 \cdot 10^{-4}$                     | $1.36 \cdot 10^{-9}$                   | 1,877,961          |
| P.h. 8          |     | Sweden  | 28              | 6304         | 4.442                            | 0.92                            | $40.9 \cdot 10^{-4}$                     | $6.63 \cdot 10^{-9}$                   | 616,334            |
| P.h. 9          |     | Sweden  | 16              | 15440        | 1.036                            | 1.,01                           | $10.5 \cdot 10^{-4}$                     | $7.58 \cdot 10^{-9}$                   | 138,078            |

|         |     |         |     |       |        |      |                       |                       |           |
|---------|-----|---------|-----|-------|--------|------|-----------------------|-----------------------|-----------|
| P.h. 10 | 2.5 | Finland | 143 | 13312 | 10.742 | 1.24 | $133.2 \cdot 10^{-4}$ | $23.31 \cdot 10^{-9}$ | 571,442   |
| P.h. 11 | 2.5 | Sweden  | 226 | 14176 | 15.942 | 1.37 | $218.4 \cdot 10^{-4}$ | $29.10 \cdot 10^{-9}$ | 750,555   |
| P.h. 12 | 2.5 | Sweden  | 184 | 8752  | 21.024 | 0.77 | $161.9 \cdot 10^{-4}$ | $18.20 \cdot 10^{-9}$ | 889,467   |
| P.h. 13 | 2.5 | Sweden  | 70  | 8512  | 8.224  | 0.66 | $54.3 \cdot 10^{-4}$  | $24.63 \cdot 10^{-9}$ | 220,367   |
| P.h. 14 | 1.5 | Finland | 24  | 16768 | 1.431  | 1.74 | $24.9 \cdot 10^{-4}$  | NA                    | NA        |
| P.h. 15 | 1.5 | Finland | 28  | 7264  | 3.855  | 1.01 | $38.9 \cdot 10^{-4}$  | $7.58 \cdot 10^{-9}$  | 513,611   |
| P.h. 16 | 1.5 | Finland | 30  | 6896  | 4.350  | 0.94 | $40.9 \cdot 10^{-4}$  | $6.38 \cdot 10^{-9}$  | 640,960   |
| P.h. 17 | 1.5 | Finland | 83  | 27824 | 2.983  | 3.07 | $91.6 \cdot 10^{-4}$  | $12.90 \cdot 10^{-9}$ | 709,916   |
| P.h. 18 | 1.5 | Finland | 11  | 5328  | 2.065  | 0.55 | $11.4 \cdot 10^{-4}$  | $3.60 \cdot 10^{-9}$  | 315,420   |
| P.h. 19 | 1.5 | Finland | 39  | 17072 | 2.284  | 2.12 | $48.4 \cdot 10^{-4}$  | $13.75 \cdot 10^{-9}$ | 352,219   |
| P.h. 20 | 2   | Finland | 44  | 6480  | 6.790  | 0.80 | $54.3 \cdot 10^{-4}$  | $15.63 \cdot 10^{-9}$ | 347,543   |
| P.h. 21 | 2.5 | Finland | 31  | 6768  | 4.580  | 0.80 | $36.6 \cdot 10^{-4}$  | $1.50 \cdot 10^{-9}$  | 2,442,868 |
| P.h. 22 | 2   | Finland | 25  | 5648  | 4.426  | 0.65 | $28.8 \cdot 10^{-4}$  | $5.40 \cdot 10^{-9}$  | 531,816   |
| P.h. 23 | 2   | Finland | 58  | 10976 | 5.284  | 1.36 | $71.9 \cdot 10^{-4}$  | $9.38 \cdot 10^{-9}$  | 766,161   |
| P.h. 24 | 2   | Finland | 8   | 4336  | 1.845  | 0.51 | $9.4 \cdot 10^{-4}$   | $5.20 \cdot 10^{-9}$  | 180,954   |

|         |     |         |     |       |        |      |                       |                       |           |
|---------|-----|---------|-----|-------|--------|------|-----------------------|-----------------------|-----------|
| P.h. 25 | 2   | Finland | 58  | 4144  | 13.996 | 0.49 | $68.6 \cdot 10^{-4}$  | $10.12 \cdot 10^{-9}$ | 677,679   |
| P.h. 26 | 1.5 | Finland | 103 | 8144  | 12.647 | 1.06 | $134.1 \cdot 10^{-4}$ | $9.90 \cdot 10^{-9}$  | 1,354,160 |
| P.h. 27 | 2   | Finland | 22  | 7312  | 3.009  | 0.91 | $27.4 \cdot 10^{-4}$  | $6.63 \cdot 10^{-9}$  | 412,966   |
| P.h. 28 | 1.5 | Finland | 43  | 6832  | 6.294  | 0.76 | $47.8 \cdot 10^{-4}$  | $11.67 \cdot 10^{-9}$ | 409,886   |
| P.h. 29 | 2   | Finland | 28  | 3824  | 7.322  | 0.38 | $27.8 \cdot 10^{-4}$  | $11.00 \cdot 10^{-9}$ | 252,948   |
| P.h. 30 | 2   | Finland | 61  | 11904 | 5.124  | 1.41 | $72.3 \cdot 10^{-4}$  | $10.44 \cdot 10^{-9}$ | 692,079   |
| P.h. 31 | 2.5 | Finland | 32  | 5536  | 5.780  | 0.58 | $33.5 \cdot 10^{-4}$  | $9.06 \cdot 10^{-9}$  | 370,044   |
| P.h. 32 | 2.5 | Finland | 30  | 6672  | 4.496  | 0.71 | $31.9 \cdot 10^{-4}$  | $5.11 \cdot 10^{-9}$  | 624,745   |
| P.h. 33 | 2.5 | Finland | 13  | 8064  | 1.612  | 1.05 | $16.9 \cdot 10^{-4}$  | $10.27 \cdot 10^{-9}$ | 164,821   |
| P.h. 34 | 2   | Finland | 61  | 8080  | 7.550  | 0.81 | $61.2 \cdot 10^{-4}$  | $11.34 \cdot 10^{-9}$ | 539,250   |
| P.h. 35 | 2.5 | Finland | 28  | 9504  | 2.946  | 1.05 | $30.9 \cdot 10^{-4}$  | $1.36 \cdot 10^{-9}$  | 2,274,584 |
| P.h. 36 | 2.5 | Finland | 41  | 4384  | 9.352  | 0.60 | $56.1 \cdot 10^{-4}$  | $9.92 \cdot 10^{-9}$  | 565,657   |
| P.h. 37 | 2   | Finland | 14  | 5872  | 2.384  | 0.70 | $16.7 \cdot 10^{-4}$  | $10.96 \cdot 10^{-9}$ | 152,275   |
| P.h. 38 | 2   | Finland | 1   | 2400  | 0.417  | 0.36 | $1.5 \cdot 10^{-4}$   | 0                     | 0         |

|         |     |           |     |       |        |      |                        |                        |           |
|---------|-----|-----------|-----|-------|--------|------|------------------------|------------------------|-----------|
| P.h. 39 | 2.5 | Finland   | 0   | 4768  | 0      | 0.56 | 0                      | 0                      | 0         |
| P.h. 40 | 2.5 | Finland   | 27  | 5568  | 4.849  | 0.69 | $33.5 \times 10^{-4}$  | $5.16 \times 10^{-9}$  | 648,431   |
| P.h. 41 | 2   | Finland   | 46  | 5120  | 8.984  | 0.70 | $62.9 \times 10^{-4}$  | $8.69 \times 10^{-9}$  | 723,713   |
| P.h. 42 | 2   | Finland   | 12  | 5168  | 2.322  | 0.54 | $12.5 \times 10^{-4}$  | $4.13 \times 10^{-9}$  | 303,600   |
| P.h. 43 | 2   | Finland   | 68  | 5552  | 12.248 | 0.75 | $91.9 \times 10^{-4}$  | $5.43 \times 10^{-9}$  | 1,691,690 |
| P.h. 44 | 2.5 | Finland   | 89  | 8208  | 10.843 | 0.95 | $103.0 \times 10^{-4}$ | $12.19 \times 10^{-9}$ | 845,031   |
| P.h. 45 | 1.5 | Finland   | 35  | 4528  | 7.730  | 0.70 | $54.1 \times 10^{-4}$  | $7.50 \times 10^{-9}$  | 721,437   |
| P.h. 46 | 1.5 | Finland   | 27  | 4528  | 5.963  | 1.02 | $60.8 \times 10^{-4}$  | $11.50 \times 10^{-9}$ | 528,883   |
| P.h. 47 | 1.5 | Greenland | 144 | 9504  | 15.152 | 0.75 | $113.6 \times 10^{-4}$ | $11.67 \times 10^{-9}$ | 973,748   |
| P.h. 48 | 1.5 | Greenland | 48  | 9728  | 4.934  | 0.87 | $42.9 \times 10^{-4}$  | $31.30 \times 10^{-9}$ | 137,149   |
| P.h. 49 | 1.5 | Greenland | 56  | 11856 | 4.723  | 0.74 | $35.0 \times 10^{-4}$  | $13.46 \times 10^{-9}$ | 259,679   |
| P.h. 50 | 1.5 | Greenland | 15  | 8416  | 1.782  | 0.6  | $10.7 \times 10^{-4}$  | $9.92 \times 10^{-9}$  | 107,802   |
| P.h. 51 | 1.5 | Greenland | 7   | 3920  | 1.786  | 0.33 | $5.9 \times 10^{-4}$   | 0                      | 0         |
| P.h. 52 | 1.5 | Greenland | 3   | 5088  | 0.590  | 0.4  | $2.4 \times 10^{-4}$   | $10.12 \times 10^{-9}$ | 23,305    |

\* NA = not available, too small P(follicle) values
